# Supplementary material for: The Surprise Question and clinician-predicted prognosis: systematic review and meta-analysis
Source: HighWire-hosted journal article supplement (doi:10.1136/spcare-2024-004879), 2024-06-26
Supplement: spcare-2024-004879supp002_data_supplement.pdf [file spcare-2024-004879supp002_data_supplement.pdf]

**Table 2:** Characteristics of studies included in systematic review.

| First author                 | Year | Country              | Time                         | Setting              | Speciality               | Respondent(s)                             | Patients | Patient age (years) | Male patients (%) |
|------------------------------|------|----------------------|------------------------------|----------------------|--------------------------|-------------------------------------------|----------|---------------------|-------------------|
| <b>Mahes A.</b>              | 2023 | USA                  | 1-year                       | Hospital outpatient  | Unselected               | Physicians                                | 301      | 74.7 ± 8.2          | 67.1              |
| <b>Lin C.A.</b>              | 2023 | Brazil               | 1-year                       | Hospital outpatient  | General medicine         | Physicians                                | 840      | 60.9 ± 14.9         | 31.9              |
| <b>Um Y.W.</b>               | 2023 | South Korea          | 30-days                      | Emergency department | Unselected               | Physicians                                | 300      | 70.5 (59.3-81.8)    | 54                |
| <b>Dogbey D.M.</b>           | 2022 | South Africa         | 6-months                     | Inpatient            | Oncology                 | Physicians                                | 43       | 58 (45-68)          | 35                |
| <b>Kim S.H.</b>              | 2022 | South Korea          | 7-days<br>21-days<br>42-days | Inpatient            | Oncology                 | Physicians                                | 130      | 66.0 ± 12.2         | 50.8              |
| <b>Maes H.</b>               | 2022 | Belgium              | 1-year                       | Hospital inpatient   | Unselected<br>Cardiology | Physicians                                | 381      | Not reported        | 81.4              |
| <b>Gaffney L.</b>            | 2022 | Ireland              | 1-year                       | Emergency department | Unselected               | Physicians                                | 191      | 79 (74-83)          | 45                |
| <b>Ikari T.</b>              | 2021 | Japan, Korea, Taiwan | 1-day                        | Inpatient            | Oncology                 | Physicians                                | 1411     | 72.6 ± 12.2         | 50.7              |
| <b>Ikari T.</b>              | 2021 | Japan, Korea, Taiwan | 3-days                       | Inpatient            | Oncology                 | Physicians                                | 1411     | 72.6 ± 12.2         | 50.7              |
| <b>Moor C.C.</b>             | 2021 | Netherlands          | 1-year                       | Outpatient           | Respiratory              | Physicians<br>Specialist nurses           | 140      | 74.0 ± 6.5          | 87.1              |
| <b>Gonzalez-Jaramillo V.</b> | 2021 | Colombia             | 1-year                       | Outpatient           | Cardiology               | Physicians                                | 174      | 70 (58-77)          | 55.2              |
| <b>Tripp D.</b>              | 2021 | USA                  | 30-days<br>1-year            | Inpatient            | Respiratory              | Physicians<br>Advanced practice providers | 428      | Not reported        | 49.1              |
| <b>Ermers D.J.M.</b>         | 2021 | Netherlands          | 1-year                       | Hospital outpatient  | Oncology                 | Physicians<br>Trainee physicians          | 379      | 59.4 ± 15           | 55.7              |
| <b>Yarnell C.</b>            | 2021 | Canada               | 1-year                       | Hospital inpatient   | General medicine         | Physicians<br>Trainee physicians          | 417      | 75 (60-85)          | 52.0              |

|                          |      |             |                             |                      |              |                                                                   |       |              |              |
|--------------------------|------|-------------|-----------------------------|----------------------|--------------|-------------------------------------------------------------------|-------|--------------|--------------|
| <b>Ros M.M.</b>          | 2021 | Netherlands | 2-days<br>10-days<br>1-year | Intensive care unit  | Unselected   | Physicians                                                        | 3140  | 63.5 ± 16.6  | 57.1         |
| <b>Flierman I.</b>       | 2020 | Netherlands | 1-year                      | Inpatient            | Unselected   | Nurses                                                            | 234   | 81.2 ± 6.6   | 48.4         |
| <b>Van Wijmen M.P.S.</b> | 2020 | Netherlands | 1-year                      | Primary care         | Unselected   | Physicians                                                        | 57    | Not reported | 28.4         |
| <b>Ramer S.J.</b>        | 2020 | USA         | 2-years                     | Hospital outpatient  | Nephrology   | Physicians<br>Advanced practitioners                              | 377   | 72 (66-78)   | 49           |
| <b>Lai C.-F.</b>         | 2020 | Taiwan      | 1-year                      | Hospital outpatient  | Nephrology   | Nurses                                                            | 401   | 56.2 ± 14    | 49.9         |
| <b>Rauh L.A.</b>         | 2020 | USA         | 1-year                      | Hospital outpatient  | Oncology     | Physician<br>Nurse<br>Advanced practice providers                 | 358   | Not reported | Not reported |
| <b>Yen Y.-F.</b>         | 2020 | Taiwan      | 1-year                      | Hospital inpatient   | Unselected   | Nurses                                                            | 21098 | 62.8 ± 19.0  | 53.2         |
| <b>Ouchi K.</b>          | 2019 | USA         | 30-days                     | Emergency department | Unselected   | Physicians                                                        | 10737 | 75.9 ± 8.8   | 48.5         |
| <b>Verhoef M.J.</b>      | 2019 | Netherlands | 1-year                      | Emergency department | Oncology     | Physicians                                                        | 245   | 62 (45-79)   | 48           |
| <b>Aaronson E.L.</b>     | 2019 | USA         | 1-year                      | Emergency department | Cardiology   | Physicians                                                        | 193   | 74.5 ± 12.6  |              |
| <b>Schmidt R.J.</b>      | 2019 | USA         | 1-year                      | Hospital outpatient  | Nephrology   | Physicians<br>Trainee physicians<br>Nurse practitioners           | 749   | 69.3 ± 14.6  | 50.9         |
| <b>Lakin J.R.</b>        | 2019 | USA         | 2-years                     | Primary care         | Primary care | Physicians<br>Nurses                                              | 2611  | Not reported | 40.9         |
| <b>Veldhoven C.M.M.</b>  | 2019 | Netherlands | 1-year                      | Primary care         | Unselected   | Physicians                                                        | 292   | 84 ± 5.5     | 40.1         |
| <b>Haydar S.A.</b>       | 2019 | USA         | 30-days                     | Emergency department | Unselected   | Physicians                                                        | 6122  | 66 (51-79)   | 51.7         |
| <b>Straw S.</b>          | 2019 | UK          | 1-year                      | Hospital inpatient   | Cardiology   | Physicians<br>Trainee-physicians<br>Nurses<br>Nurse practitioners | 129   | 71 ± 14      | 64           |
| <b>Rice J.</b>           | 2018 | Canada      | 3-months                    | Nursing home         | Unselected   | Physicians                                                        | 301   | 85.9 ± 9.0   | 67.8         |

|                              |      |           |                    |                                                                                       |                     |                                                         |      |              |                 |
|------------------------------|------|-----------|--------------------|---------------------------------------------------------------------------------------|---------------------|---------------------------------------------------------|------|--------------|-----------------|
|                              |      |           | 6-months           |                                                                                       |                     | Nurses<br>Support workers                               |      |              |                 |
| <b>Burke K.</b>              | 2018 | UK        | 90-days<br>1-year  | Hospice                                                                               | Paediatric          | Physicians<br>Nurses<br>Administrators                  | 327  | 7.6 ± 5.3    | 56.6            |
| <b>Ouchi K.</b>              | 2018 | USA       | 1-year             | Emergency<br>department                                                               | Unselected          | Physicians                                              | 207  | 75 ± 7.5     | 51.2            |
| <b>Liyanage T.</b>           | 2018 | Australia | 1-year             | Nursing home                                                                          | Unselected          | Nurses                                                  | 187  | 82.4 ± 9.1   | 44.4            |
| <b>Mitchell<br/>G.K.</b>     | 2018 | Australia | 1-year             | Primary care                                                                          | Unselected          | Physicians                                              | 4365 | Not reported | Not<br>reported |
| <b>Ebke M.</b>               | 2018 | Germany   | 1-year             | Hospital<br>outpatient                                                                | Neurorehabilitation | Physicians                                              | 236  | 63 ± 14      | 57.7            |
| <b>Mudge A.M.</b>            | 2018 | Australia | 1-year             | Hospital<br>inpatient                                                                 | Unselected          | Physicians<br>Nurses                                    | 100  | 60.2 ± 18.9  | 53.8            |
| <b>Gulini<br/>J.E.H.M.B.</b> | 2018 | Brazil    | 1-day              | Intensive care<br>unit                                                                | Unselected          | Physicians                                              | 170  | 57 ± 15.6    | 51.2            |
| <b>Salat H.</b>              | 2017 | USA       | 1.9-years          | Hospital<br>outpatient                                                                | Nephrology          | Physician                                               | 488  | 71 (65-77)   | 49              |
| <b>Malhotra R.</b>           | 2017 | USA       | 6-months<br>1-year | Hospital<br>outpatient                                                                | Nephrology          | Physician                                               | 215  | Not reported | 55              |
| <b>Hadique S.</b>            | 2017 | USA       | 6-months           | Intensive care<br>unit                                                                | Unselected          | Physician                                               | 1043 | Not reported | 53.7            |
| <b>Gomez-<br/>Batiste X.</b> | 2017 | Spain     | 1-year<br>2-years  | Primary care<br>Hospital<br>outpatient<br>Intermediate<br>care centre<br>Nursing home | Unselected          | Physician/nurse                                         | 1059 | Not reported | Not<br>reported |
| <b>Javier A.D.</b>           | 2017 | USA       | 1-year             | Hospital<br>outpatient                                                                | Nephrology          | Physicians<br>Trainee physicians<br>Nurse practitioners | 388  | 71 (65-77)   | 49.7            |
| <b>Amro O.W.</b>             | 2016 | USA       | 1-year             | Hospital<br>outpatient                                                                | Nephrology          | Physicians                                              | 201  | 66           | 52.2            |
| <b>Lakin J.R.</b>            | 2016 | USA       | 1-year             | Primary care                                                                          | Unselected          | Physicians                                              | 1737 | 65           | 39.7            |

|                         |      |             |                    |                                        |                       |                                   |      |               |              |
|-------------------------|------|-------------|--------------------|----------------------------------------|-----------------------|-----------------------------------|------|---------------|--------------|
| <b>Carmen J.</b>        | 2016 | Spain       | 1-year             | Hospital outpatient                    | Nephrology            | Physicians                        | 49   | Not reported  | Not reported |
| <b>Hamano J.</b>        | 2015 | Japan       | 7-days<br>30-days  | Hospital and community palliative care | Oncology              | Physicians                        | 2361 | 69.1 ± 12.8   | 57.5         |
| <b>Feyi K.</b>          | 2015 | UK          | 1-year             | Hospital outpatient                    | Nephrology            | Physicians<br>Nurses              | 178  | 72            | 63.2         |
| <b>Moroni M.</b>        | 2014 | Italy       | 1-year             | Primary care                           | Primary care/oncology | Physicians                        | 231  | 70.2 (SE 0.9) | 50.6         |
| <b>O'Callaghan A.</b>   | 2014 | New Zealand | 6-months<br>1-year | Hospital inpatient                     | Acute medicine        | Physicians<br>Nurse practitioners | 501  | Not reported  | Not reported |
| <b>Da Silva Gane M.</b> | 2013 | UK          | 1-year             | Hospital outpatient                    | Nephrology            | Physician<br>Nurses               | 3896 | Not reported  | Not reported |
| <b>Pang W.-F.</b>       | 2013 | China       | 1-year             | Hospital outpatient                    | Nephrology            | Physicians                        | 367  | 60.2 ± 12.3   | 55.9         |
| <b>Haga K.</b>          | 2012 | UK          | 1-year             | Hospital outpatient                    | Cardiology            | Nurses                            | 138  | 77 ± 10       | 66           |
| <b>Fenning S.</b>       | 2012 | UK          | 1-year             | Hospital outpatient                    | Cardiology            | Physicians                        | 172  | 66 ± 14       | 61           |
| <b>Moss A.H.</b>        | 2010 | USA         | 1-year             | Hospital outpatient                    | Oncology              | Physicians                        | 826  | Not reported  | Not reported |
| <b>Cohen L.M.</b>       | 2010 | USA         | 6-months           | Hospital outpatient                    | Nephrology            | Physicians                        | 450  | Not reported  | 56.7         |
| <b>Moss A.H.</b>        | 2008 | USA         | 1-year             | Hospital outpatient                    | Nephrology            | Physicians                        | 147  | 66.4 ± 14.8   | 55.1         |
| <b>Barnes S.</b>        | 2008 | UK          | 1-year             | Primary care                           | Cardiology            | Physicians                        | 231  | 77            | 54.1         |

Age is displayed as mean ± standard deviation or median (interquartile range) where available.

**Table 3:** Accuracy of individual studies.

| First author          | Sample size         | Surprise Question results   |       |      |       | Diagnostic test results |                      |                                    |                                    |                   |
|-----------------------|---------------------|-----------------------------|-------|------|-------|-------------------------|----------------------|------------------------------------|------------------------------------|-------------------|
|                       |                     | Surprise Question responses | Total | Dead | Alive | Sensitivity (95% CI)    | Specificity (95% CI) | Positive predictive value (95% CI) | Negative predictive value (95% CI) | Accuracy (95% CI) |
| Rice J.               | 301                 | Not surprised               | 191   | 62   | 134   | 0.646                   | 0.544                | 0.316                              | 0.825                              | 0.569             |
|                       |                     | Surprised                   | 194   | 34   | 160   | (0.541 – 0.741)         | (0.485 – 0.602)      | (0.276 – 0.360)                    | (0.779 – 0.863)                    | (0.518 – 0.619)   |
| Ikari T.              | 1411                | Not surprised               | 847   | 232  | 615   | 0.820                   | 0.455                | 0.274                              | 0.910                              | 0.528             |
|                       |                     | Surprised                   | 564   | 51   | 513   | (0.770 – 0.863)         | (0.425 – 0.4840)     | (0.259 – 0.289)                    | (0.886 – 0.929)                    | (0.502 – 0.554)   |
| Ikari T.              | 1411                | Not surprised               | 1179  | 636  | 543   | 0.944                   | 0.263                | 0.539                              | 0.836                              | 0.588             |
|                       |                     | Surprised                   | 232   | 38   | 194   | (0.923 – 0.960)         | (0.232 – 0.297)      | (0.528 – 0.551)                    | (0.786 – 0.877)                    | (0.562 – 0.614)   |
| Dogbey D.M.           | 43                  | Not surprised               | 21    | 18   | 3     | 0.667                   | 0.813                | 0.857                              | 0.591                              | 0.721             |
|                       |                     | Surprised                   | 22    | 9    | 13    | (0.460 – 0.835)         | (0.544 – 0.960)      | (0.676 – 0.945)                    | (0.446 – 0.721)                    | (0.563 – 0.847)   |
| Moor C.C.             | 140                 | Not surprised               | 39    | 19   | 20    | 0.679                   | 0.821                | 0.487                              | 0.911                              | 0.793             |
|                       |                     | Surprised                   | 101   | 9    | 92    | (0.477 – 0.841)         | (0.738 – 0.887)      | (0.372 – 0.604)                    | (0.856 – 0.946)                    | (0.716 – 0.857)   |
| Gonzalez-Jaramillo V. | 174                 | Not surprised               | 83    | 17   | 66    | 0.850                   | 0.571                | 0.205                              | 0.967                              | 0.603             |
|                       |                     | Surprised                   | 91    | 3    | 88    | (0.621 – 0.968)         | (0.489 – 0.651)      | (0.166 – 0.250)                    | (0.911 – 0.988)                    | (0.527 – 0.677)   |
| Tripp D.              | 381 (30 days)       | Not surprised               | 19    | 2    | 17    | 0.125                   | 0.953                | 0.105                              | 0.961                              | 0.919             |
|                       |                     | Surprised                   | 362   | 14   | 348   | (0.016 – 0.384)         | (0.927 – 0.973)      | (0.029 – 0.318)                    | (0.954 – 0.968)                    | (0.887 – 0.944)   |
|                       | 365 (365 days)      | Not surprised               | 108   | 38   | 70    | 0.469                   | 0.754                | 0.352                              | 0.833                              | 0.690             |
|                       |                     | Surprised                   | 257   | 43   | 214   | (0.357 – 0.583)         | (0.699 – 0.803)      | (0.285 – 0.425)                    | (0.801 – 0.861)                    | (0.640 – 0.738)   |
| Flierman I.           | 234                 | Not surprised               | 135   | 59   | 76    | 0.808                   | 0.528                | 0.437                              | 0.859                              | 0.615             |
|                       |                     | Surprised                   | 99    | 14   | 85    | (0.699 – 0.891)         | (0.448 – 0.607)      | (0.389 – 0.486)                    | (0.788 – 0.909)                    | (0.550 – 0.678)   |
| Kim S.H.              | 130 (7 days)        | Not surprised               | 20    | 7    | 13    | 0.467                   | 0.887                | 0.350                              | 0.927                              | 0.839             |
|                       |                     | Surprised                   | 110   | 8    | 102   | (0.213 – 0.734)         | (0.815 – 0.938)      | (0.204 – 0.531)                    | (0.888 – 0.954)                    | (0.764 – 0.897)   |
|                       | 130 (21 days)       | Not surprised               | 54    | 37   | 17    | 0.529                   | 0.717                | 0.685                              | 0.566                              | 0.615             |
|                       |                     | Surprised                   | 76    | 33   | 43    | (0.406 – 0.649)         | (0.586 – 0.826)      | (0.579 – 0.775)                    | (0.493 – 0.636)                    | (0.526 – 0.699)   |
|                       | 130 (42 days)       | Not surprised               | 100   | 87   | 13    | 0.821                   | 0.458                | 0.870                              | 0.367                              | 0.754             |
|                       |                     | Surprised                   | 30    | 19   | 11    | (0.734 – 0.889)         | (0.256 – 0.672)      | (0.821 – 0.907)                    | (0.242 – 0.512)                    | (0.671 – 0.825)   |
| Ouchi K.              | 10737               | Not surprised               | 3324  | 685  | 2639  | 0.433                   | 0.820                | 0.206                              | 0.931                              | 0.782             |
|                       |                     | Surprised                   | 12899 | 896  | 12003 | (0.409 – 0.458)         | (0.813 – 0.826)      | (0.196 – 0.217)                    | (0.928 – 0.933)                    | (0.776 – 0.788)   |
| Erners D.J.M.         | 379 (SQ1)           | Not surprised               | 188   | 103  | 85    | 0.873                   | 0.674                | 0.548                              | 0.922                              | 0.736             |
|                       |                     | Surprised                   | 191   | 15   | 176   | (0.799 – 0.927)         | (0.614 – 0.731)      | (0.501 – 0.594)                    | (0.879 – 0.950)                    | (0.689 – 0.780)   |
|                       | 188 (SQ2)           | Not surprised               | 105   | 42   | 63    | 0.408                   | 0.259                | 0.400                              | 0.265                              | 0.340             |
|                       |                     | Surprised                   | 83    | 61   | 22    | (0.312 – 0.509)         | (0.170 – 0.365)      | (0.339 – 0.465)                    | (0.196 – 0.348)                    | (0.273 – 0.413)   |
| Yarnell C.            | 417 (AP – 365 days) | Not surprised               | 298   | 143  | 155   | 0.894                   | 0.397                | 0.480                              | 0.857                              | 0.588             |
|                       |                     | Surprised                   | 119   | 17   | 102   | (0.835 – 0.937)         | (0.337 – 0.460)      | (0.452 – 0.508)                    | (0.789 – 0.906)                    | (0.539 – 0.635)   |
|                       |                     | Not surprised               | 250   | 132  | 118   | 0.825                   | 0.541                | 0.528                              | 0.832                              | 0.650             |

|                          |                            |               |               |     |       |                 |                 |                 |                 |                 |                 |
|--------------------------|----------------------------|---------------|---------------|-----|-------|-----------------|-----------------|-----------------|-----------------|-----------------|-----------------|
|                          | 417 (SMR – 365 days)       | Surprised     | 167           | 28  | 139   | (0.757 – 0.881) | (0.478 – 0.603) | (0.490 – 0.565) | (0.777 – 0.876) | (0.602 – 0.696) |                 |
|                          | 288 (AP - admission)       | Not surprised | 53            | 21  | 32    | 0.636           | 0.875           | 0.396           | 0.949           | 0.847           |                 |
|                          |                            | Surprised     | 235           | 12  | 223   | (0.451 – 0.796) | (0.828 – 0.913) | (0.303 – 0.498) | (0.922 – 0.967) | (0.800 – 0.887) |                 |
|                          | 288 (SMR – admission)      | Not surprised | 47            | 16  | 31    | 0.485           | 0.878           | 0.340           | 0.930           | 0.833           |                 |
|                          |                            | Surprised     | 241           | 17  | 224   | (0.308 – 0.665) | (0.832 – 0.916) | (0.242 – 0.455) | (0.904 – 0.949) | (0.785 – 0.875) |                 |
| <b>Van Wijmen M.P.S.</b> | 57                         | Not surprised | 19            | 18  | 1     | 0.692           | 0.968           | 0.947           | 0.790           | 0.842           |                 |
|                          |                            | Surprised     | 38            | 8   | 30    | (0.482 – 0.857) | (0.833 – 0.999) | (0.720 – 0.992) | (0.677 – 0.870) | (0.721 – 0.925) |                 |
| <b>Ramer S.J.</b>        | 377                        | Not surprised | 124           | 45  | 79    | 0.672           | 0.745           | 0.363           | 0.913           | 0.732           |                 |
|                          |                            | Surprised     | 253           | 22  | 231   | (0.546 – 0.782) | (0.693 – 0.793) | (0.307 – 0.423) | (0.881 – 0.937) | (0.684 – 0.776) |                 |
| <b>Lai C.-F.</b>         | 401                        | Not surprised | 34            | 18  | 16    | 0.529           | 0.956           | 0.529           | 0.956           | 0.920           |                 |
|                          |                            | Surprised     | 367           | 16  | 351   | (0.351 – 0.702) | (0.930 – 0.975) | (0.388 – 0.667) | (0.939 – 0.969) | (0.889 – 0.945) |                 |
| <b>Rauh L.A.</b>         | 231 (MD – UPMC)            | Not surprised | 90            | 36  | 54    | 0.706           | 0.700           | 0.400           | 0.894           | 0.701           |                 |
|                          |                            | Surprised     | 141           | 15  | 126   | (0.562 – 0.825) | (0.627 – 0.766) | (0.334 – 0.470) | (0.845 – 0.929) | (0.638 – 0.760) |                 |
|                          | 168 (RN – UPMC)            | Not surprised | 61            | 31  | 30    | 0.689           | 0.756           | 0.508           | 0.869           | 0.738           |                 |
|                          |                            | Surprised     | 107           | 14  | 93    | (0.534 – 0.818) | (0.671 – 0.829) | (0.417 – 0.599) | (0.810 – 0.912) | (0.665 – 0.803) |                 |
|                          | 199 (APP – UPMC)           | Not surprised | 81            | 35  | 46    | 0.796           | 0.703           | 0.432           | 0.924           | 0.724           |                 |
|                          |                            | Surprised     | 118           | 9   | 109   | (0.647 – 0.902) | (0.625 – 0.774) | (0.364 – 0.503) | (0.870 – 0.956) | (0.656 – 0.785) |                 |
|                          | 78 (MD – UVA)              | Not surprised | 39            | 19  | 20    | 0.864           | 0.643           | 0.487           | 0.923           | 0.705           |                 |
|                          |                            | Surprised     | 39            | 3   | 36    | (0.651 – 0.971) | (0.504 – 0.766) | (0.392 – 0.584) | (0.805 – 0.972) | (0.591 – 0.803) |                 |
|                          | 130 (RN – UVA)             | Not surprised | 82            | 29  | 53    | 0.725           | 0.411           | 0.354           | 0.771           | 0.508           |                 |
|                          |                            | Surprised     | 48            | 11  | 37    | (0.561 – 0.854) | (0.308 – 0.520) | (0.297 – 0.414) | (0.658 – 0.855) | (0.419 – 0.596) |                 |
|                          | 22 (APP – UVA)             | Not surprised | 17            | 8   | 9     | 1.000           | 0.357           | 0.471           | 1.000           | 0.591           |                 |
|                          |                            | Surprised     | 5             | 0   | 5     | (0.631 – 1.000) | (0.128 – 0.649) | (0.376 – 0.568) |                 | (0.364 – 0.793) |                 |
|                          | 309 (MD – combined)        | Not surprised | 129           | 55  | 74    | 0.753           | 0.686           | 0.426           | 0.900           | 0.702           |                 |
|                          |                            | Surprised     | 180           | 18  | 162   | (0.639 – 0.847) | (0.623 – 0.745) | (0.371 – 0.483) | (0.857 – 0.931) | (0.648 – 0.753) |                 |
|                          | 298 (RN – combined)        | Not surprised | 143           | 60  | 83    | 0.706           | 0.610           | 0.420           | 0.839           | 0.638           |                 |
|                          |                            | Surprised     | 155           | 25  | 130   | (0.597 – 0.800) | (0.541 – 0.676) | (0.368 – 0.473) | (0.786 – 0.880) | (0.580 – 0.692) |                 |
|                          | 221 (APP – combined)       | Not surprised | 98            | 43  | 55    | 0.827           | 0.675           | 0.439           | 0.927           | 0.710           |                 |
|                          |                            | Surprised     | 123           | 9   | 114   | (0.697 – 0.918) | (0.598 – 0.745) | (0.378 – 0.501) | (0.874 – 0.959) | (0.646 – 0.769) |                 |
|                          | <b>Verhoef M.-J.</b>       | 245           | Not surprised | 203 | 172   | 31              | 0.891           | 0.404           | 0.847           | 0.500           | 0.788           |
|                          |                            |               | Surprised     | 42  | 21    | 21              | (0.839 – 0.931) | (0.270 – 0.549) | (0.815 – 0.875) | (0.373 – 0.628) | (0.731 – 0.837) |
| <b>Maes H.</b>           | 190 (Acute Geriatric Unit) | Not surprised | 66            | 31  | 35    | 0.674           | 0.757           | 0.470           | 0.879           | 0.737           |                 |
|                          |                            | Surprised     | 124           | 15  | 109   | (0.520 – 0.805) | (0.679 – 0.825) | (0.384 – 0.557) | (0.826 – 0.918) | (0.668 – 0.798) |                 |
|                          | 189 (Cardiology Unit)      | Not surprised | 63            | 23  | 40    | 0.622           | 0.737           | 0.365           | 0.889           | 0.714           |                 |
|                          |                            | Surprised     | 126           | 14  | 112   | (0.448 – 0.775) | (0.659 – 0.805) | (0.285 – 0.453) | (0.840 – 0.924) | (0.644 – 0.778) |                 |
| <b>Yen Y.-F.</b>         | 21098                      | Not surprised | 2620          | 799 | 1821  | 0.456           | 0.906           | 0.305           | 0.948           | 0.868           |                 |
|                          |                            | Surprised     | 18478         | 955 | 17523 | (0.432 – 0.479) | (0.901 – 0.910) | (0.291 – 0.319) | (0.946 – 0.950) | (0.864 – 0.873) |                 |
|                          | 193                        | Not surprised | 103           | 44  | 59    | 0.786           | 0.569           | 0.427           | 0.867           | 0.632           |                 |

|                            |                                      |               |      |     |                 |                 |                 |                 |                 |                 |
|----------------------------|--------------------------------------|---------------|------|-----|-----------------|-----------------|-----------------|-----------------|-----------------|-----------------|
| <b>Aaronson E.L.</b>       |                                      | Surprised     | 90   | 12  | 78              | (0.656 – 0.884) | (0.482 – 0.654) | (0.371 – 0.486) | (0.794 – 0.916) | (0.560 – 0.700) |
| <b>Schmidt R.J.</b>        | 749                                  | Not surprised | 173  | 61  | 112             | 0.604           | 0.827           | 0.353           | 0.931           | 0.797           |
|                            |                                      | Surprised     | 576  | 40  | 536             | (0.502 – 0.700) | (0.796 – 0.856) | (0.302 – 0.407) | (0.913 – 0.945) | (0.766 – 0.825) |
| <b>Lakin J.R.</b>          | 1448 (Nurses)                        | Not surprised | 352  | 112 | 240             | 0.526           | 0.806           | 0.318           | 0.908           | 0.765           |
|                            |                                      | Surprised     | 1096 | 101 | 995             | (0.457 – 0.595) | (0.783 – 0.827) | (0.282 – 0.356) | (0.895 – 0.919) | (0.742 – 0.786) |
|                            | 1163 (Physicians)                    | Not surprised | 452  | 143 | 309             | 0.794           | 0.686           | 0.316           | 0.948           | 0.703           |
|                            |                                      | Surprised     | 711  | 37  | 674             | (0.728 – 0.851) | (0.656 – 0.715) | (0.291 – 0.343) | (0.932 – 0.961) | (0.675 – 0.729) |
| <b>Veldhoven C.M.M.</b>    | 292 (SQ1)                            | Not surprised | 161  | 24  | 137             | 0.923           | 0.485           | 0.149           | 0.985           | 0.524           |
|                            |                                      | Surprised     | 131  | 2   | 129             | (0.749 – 0.991) | (0.424 – 0.547) | (0.130 – 0.171) | (0.944 – 0.996) | (0.465 – 0.583) |
|                            | 161 (SQ2)                            | Not surprised | 22   | 10  | 12              | 0.417           | 0.912           | 0.455           | 0.899           | 0.830           |
|                            |                                      | Surprised     | 139  | 14  | 125             | (0.221 – 0.634) | (0.852 – 0.954) | (0.289 – 0.631) | (0.864 – 0.926) | (0.772 – 0.892) |
| <b>Burke K.</b>            | 325 (majority vote – 90 days)        | Not surprised | 36   | 15  | 21              | 0.833           | 0.932           | 0.417           | 0.990           | 0.926           |
|                            |                                      | Surprised     | 289  | 3   | 286             | (0.586 – 0.964) | (0.897 – 0.957) | (0.310 – 0.531) | (0.971 – 0.996) | (0.892 – 0.952) |
|                            | 306 (majority vote – 365 days)       | Not surprised | 106  | 25  | 81              | 0.833           | 0.707           | 0.236           | 0.975           | 0.719           |
|                            |                                      | Surprised     | 200  | 5   | 195             | (0.653 – 0.944) | (0.649 – 0.760) | (0.195 – 0.282) | (0.946 – 0.989) | (0.665 – 0.769) |
|                            | 238 (100% agreement - 90 days)       | Not surprised | 21   | 14  | 7               | 0.933           | 0.969           | 0.667           | 0.995           | 0.966           |
|                            |                                      | Surprised     | 217  | 1   | 216             | (0.681 – 0.998) | (0.936 – 0.987) | (0.488 – 0.808) | (0.970 – 0.999) | (0.935 – 0.985) |
|                            | 175 (100% agreement – 365 days)      | Not surprised | 57   | 21  | 36              | 0.955           | 0.765           | 0.368           | 0.992           | 0.789           |
|                            |                                      | Surprised     | 118  | 1   | 117             | (0.772 – 0.999) | (0.689 – 0.829) | (0.302 – 0.441) | (0.945 – 0.999) | (0.721 – 0.847) |
|                            | 290 (75 – 100% agreement – 90 days)  | Not surprised | 26   | 14  | 12              | 0.824           | 0.956           | 0.539           | 0.989           | 0.948           |
|                            |                                      | Surprised     | 264  | 3   | 261             | (0.566 – 0.962) | (0.925 – 0.977) | (0.391 – 0.679) | (0.969 – 0.996) | (0.916 – 0.971) |
|                            | 236 (75 – 100% agreement – 365 days) | Not surprised | 80   | 24  | 56              | 0.923           | 0.733           | 0.300           | 0.987           | 0.754           |
|                            |                                      | Surprised     | 156  | 2   | 154             | (0.749 – 0.991) | (0.668 – 0.792) | (0.250 – 0.355) | (0.953 – 0.997) | (0.694 – 0.808) |
|                            | 122 (Neurology – 365 days)           | Not surprised | 28   | 7   | 21              | 0.875           | 0.816           | 0.250           | 0.989           | 0.820           |
|                            |                                      | Surprised     | 94   | 1   | 93              | (0.474 – 0.997) | (0.732 – 0.882) | (0.173 – 0.347) | (0.937 – 0.998) | (0.740 – 0.883) |
|                            | 27 (Oncology – 365 days)             | Not surprised | 22   | 12  | 10              | 1.000           | 0.333           | 0.546           | 1.000           | 0.630           |
|                            |                                      | Surprised     | 5    | 0   | 5               | (0.735 – 1.000) | (0.118 – 0.616) | (0.456 – 0.632) |                 | (0.424 – 0.806) |
| 73 (Congenital – 365 days) | Not surprised                        | 24            | 4    | 20  | 0.667           | 0.702           | 0.167           | 0.959           | 0.699           |                 |
|                            | Surprised                            | 49            | 2    | 47  | (0.223 – 0.957) | (0.577 – 0.807) | (0.093 – 0.282) | (0.882 – 0.987) | (0.580 – 0.801) |                 |
| <b>Ouchi K.</b>            | 207                                  | Not surprised | 102  | 34  | 68              | 0.773           | 0.583           | 0.333           | 0.905           | 0.623           |
|                            |                                      | Surprised     | 105  | 10  | 95              | (0.622 – 0.885) | (0.503 – 0.660) | (0.282 – 0.289) | (0.844 – 0.943) | (0.553 – 0.690) |
| <b>Liyantage T.</b>        | 187                                  | Not surprised | 80   | 30  | 50              | 0.714           | 0.655           | 0.375           | 0.888           | 0.668           |
|                            |                                      | Surprised     | 107  | 12  | 95              | (0.554 – 0.843) | (0.572 – 0.732) | (0.309 – 0.446) | (0.829 – 0.928) | (0.596 – 0.735) |
| <b>Mitchell G.K.</b>       | 2840 (Intuition)                     | Not surprised | 154  | 32  | 122             | 0.337           | 0.956           | 0.208           | 0.977           | 0.935           |
|                            |                                      | Surprised     | 2686 | 63  | 2623            | (0.243 – 0.441) | (0.947 – 0.963) | (0.159 – 0.268) | (0.973 – 0.980) | (0.925 – 0.944) |

|                         |                                            |               |      |      |      |                 |                 |                 |                 |                 |
|-------------------------|--------------------------------------------|---------------|------|------|------|-----------------|-----------------|-----------------|-----------------|-----------------|
|                         | 1525 (ST)                                  | Not surprised | 179  | 25   | 154  | 0.532           | 0.896           | 0.140           | 0.984           | 0.885           |
|                         |                                            | Surprised     | 1346 | 22   | 1324 | (0.381 – 0.679) | (0.879 – 0.911) | (0.107 – 0.181) | (0.978 – 0.988) | (0.868 – 0.900) |
| <b>Ebke M.</b>          | 236<br>(Neurorehabilitation<br>Physicians) | Not surprised | 45   | 17   | 28   | 0.500           | 0.861           | 0.378           | 0.911           | 0.809           |
|                         |                                            | Surprised     | 191  | 17   | 174  |                 |                 |                 |                 |                 |
|                         | 236 (Palliative Care<br>Physicians)        | Not surprised | 83   | 23   | 60   | 0.677           | 0.703           | 0.277           | 0.928           | 0.699           |
|                         |                                            | Surprised     | 153  | 11   | 142  | (0.495 – 0.826) | (0.635 – 0.765) | (0.219 – 0.344) | (0.887 – 0.955) | (0.636 – 0.757) |
| <b>Mudge A.M.</b>       | 100                                        | Not surprised | 52   | 16   | 36   | 0.889           | 0.561           | 0.308           | 0.958           | 0.620           |
|                         |                                            | Surprised     | 48   | 2    | 46   | (0.653 – 0.986) | (0.447 – 0.670) | (0.249 – 0.374) | (0.860 – 0.989) | (0.518 – 0.715) |
| <b>Salat H.</b>         | 488                                        | Not surprised | 171  | 56   | 115  | 0.644           | 0.713           | 0.328           | 0.902           | 0.701           |
|                         |                                            | Surprised     | 317  | 31   | 286  | (0.534 – 0.744) | (0.666 – 0.757) | (0.281 – 0.378) | (0.874 – 0.925) | (0.658 – 0.741) |
| <b>Malhotra R.</b>      | 208 (180 days)                             | Not surprised | 203  | 10   | 193  | 0.769           | 0.010           | 0.049           | 0.400           | 0.058           |
|                         |                                            | Surprised     | 5    | 3    | 2    | (0.462 – 0.950) | (0.001 – 0.037) | (0.037 – 0.065) | (0.109 – 0.785) | (0.030 – 0.099) |
|                         | 189 (365 days)                             | Not surprised | 162  | 13   | 149  | 0.650           | 0.118           | 0.080           | 0.741           | 0.175           |
|                         |                                            | Surprised     | 27   | 7    | 20   | (0.408 – 0.846) | (0.074 – 0.177) | (0.059 – 0.108) | (0.580 – 0.855) | (0.123 – 0.236) |
| <b>Hadique S.</b>       | 500 (Derivation<br>cohort)                 | Not surprised | 238  | 148  | 90   | 0.822           | 0.719           | 0.622           | 0.878           | 0.756           |
|                         |                                            | Surprised     | 262  | 32   | 230  | (0.758 – 0.875) | (0.666 – 0.767) | (0.577 – 0.665) | (0.839 – 0.908) | (0.716 – 0.793) |
|                         | 543 (Validation<br>cohort)                 | Not surprised | 204  | 139  | 65   | 0.739           | 0.817           | 0.681           | 0.856           | 0.790           |
|                         |                                            | Surprised     | 339  | 49   | 290  | (0.671 – 0.801) | (0.773 – 0.856) | (0.628 – 0.730) | (0.822 – 0.883) | (0.753 – 0.824) |
| <b>Gomez-Batiste X.</b> | 1059 (365 days)                            | Not surprised | 837  | 268  | 569  | 0.937           | 0.264           | 0.320           | 0.919           | 0.446           |
|                         |                                            | Surprised     | 222  | 18   | 204  | (0.902 – 0.962) | (0.233 – 0.297) | (0.309 – 0.332) | (0.877 – 0.947) | (0.416 – 0.476) |
|                         | 1059 (730 days)                            | Not surprised | 837  | 373  | 464  | 0.914           | 0.287           | 0.446           | 0.842           | 0.529           |
|                         |                                            | Surprised     | 222  | 35   | 187  | (0.883 – 0.940) | (0.253 – 0.324) | (0.432 – 0.460) | (0.792 – 0.882) | (0.498 – 0.559) |
| <b>Javier A.D.</b>      | 388                                        | Not surprised | 137  | 33   | 104  | 0.635           | 0.691           | 0.241           | 0.924           | 0.683           |
|                         |                                            | Surprised     | 251  | 19   | 232  | (0.490 – 0.764) | (0.638 – 0.740) | (0.196 – 0.292) | (0.894 – 0.946) | (0.634 – 0.729) |
| <b>Amro O.W.</b>        | 201                                        | Not surprised | 50   | 22   | 28   | 0.550           | 0.826           | 0.440           | 0.881           | 0.771           |
|                         |                                            | Surprised     | 151  | 18   | 133  | (0.385 – 0.707) | (0.759 – 0.881) | (0.336 – 0.549) | (0.839 – 0.913) | (0.707 – 0.827) |
| <b>Lakin J.R.</b>       | 1737                                       | Not surprised | 114  | 23   | 91   | 0.205           | 0.944           | 0.202           | 0.945           | 0.896           |
|                         |                                            | Surprised     | 1623 | 89   | 1534 | (0.135 – 0.292) | (0.932 – 0.955) | (0.143 – 0.277) | (0.940 – 0.950) | (0.881 – 0.910) |
| <b>Hamano J.</b>        | 2361 (7 days)                              | Not surprised | 931  | 282  | 649  | 0.847           | 0.680           | 0.303           | 0.964           | 0.704           |
|                         |                                            | Surprised     | 1430 | 51   | 1379 | (0.804 – 0.884) | (0.659 – 0.700) | (0.287 – 0.320) | (0.955 – 0.972) | (0.685 – 0.722) |
|                         | 2361 (30 days)                             | Not surprised | 1851 | 1066 | 785  | 0.956           | 0.370           | 0.576           | 0.904           | 0.647           |
|                         |                                            | Surprised     | 510  | 49   | 461  | (0.942 – 0.967) | (0.343 – 0.397) | (0.565 – 0.587) | (0.876 – 0.926) | (0.627 – 0.666) |
| <b>Feyi K.</b>          | 178                                        | Not surprised | 58   | 37   | 21   | 0.726           | 0.835           | 0.638           | 0.883           | 0.803           |
|                         |                                            | Surprised     | 120  | 14   | 106  | (0.583 – 0.841) | (0.758 – 0.895) | (0.535 – 0.730) | (0.828 – 0.923) | (0.737 – 0.859) |
| <b>Moroni M.</b>        | 231                                        | Not surprised | 126  | 87   | 39   | 0.837           | 0.693           | 0.691           | 0.838           | 0.758           |
|                         |                                            | Surprised     | 105  | 17   | 88   | (0.751 – 0.902) | (0.605 – 0.772) | (0.629 – 0.746) | (0.768 – 0.890) | (0.697 – 0.811) |
| <b>O'Callaghan A.</b>   | 501 (180 days)                             | Not surprised | 99   | 56   | 43   | 0.727           | 0.899           | 0.566           | 0.948           | 0.872           |
|                         |                                            | Surprised     | 402  | 21   | 381  | (0.614 – 0.823) | (0.866 – 0.926) | (0.487 – 0.641) | (0.926 – 0.963) | (0.840 – 0.900) |

|                         |                           |               |      |      |                 |                 |                 |                 |                  |                  |
|-------------------------|---------------------------|---------------|------|------|-----------------|-----------------|-----------------|-----------------|------------------|------------------|
|                         | 501 (365 days)            | Not surprised | 99   | 67   | 32              | 0.626           | 0.919           | 0.677           | 0.901            | 0.856            |
|                         |                           | Surprised     | 402  | 40   | 362             | (0.527 – 0.718) | (0.887 – 0.944) | (0.593 – 0.751) | (0.876 – 0.920)  | (0.823 – 0.886)  |
| <b>Da Silva Gane M.</b> | 3896                      | Not surprised | 938  | 281  | 657             | 0.496           | 0.803           | 0.300           | 0.904            | 0.758            |
|                         |                           | Surprised     | 2958 | 285  | 2673            | (0.455 – 0.538) | (0.789 – 0.816) | (0.278 – 0.323) | (0.896 – 0.911)  | (0.744 – 0.772)  |
| <b>Pang W.-F.</b>       | 367                       | Not surprised | 109  | 27   | 82              | 0.614           | 0.746           | 0.248           | 0.934            | 0.730            |
|                         |                           | Surprised     | 258  | 17   | 241             | (0.455 – 0.756) | (0.695 – 0.793) | (0.196 – 0.308) | (0.907 – 0.9540) | (0.682 – 0.775)  |
| <b>Haga K.</b>          | 138                       | Not surprised | 120  | 39   | 81              | 0.886           | 0.138           | 0.325           | 0.722            | 0.377            |
|                         |                           | Surprised     | 18   | 5    | 13              | (0.754 – 0.962) | (0.076 – 0.225) | (0.297 – 0.355) | (0.497 – 0.873)  | (0.296 – 0.463)  |
| <b>Fenning S.</b>       | 172                       | Not surprised | 38   | 6    | 32              | 0.353           | 0.794           | 0.158           | 0.918            | 0.750            |
|                         |                           | Surprised     | 134  | 11   | 123             | (0.142 – 0.617) | (0.721 – 0.854) | (0.084 – 0.277) | (0.886 – 0.941)  | (0.678 – 0.813)  |
| <b>Moss A.H.</b>        | 826                       | Not surprised | 131  | 53   | 78              | 0.747           | 0.897           | 0.405           | 0.974            | 0.884            |
|                         |                           | Surprised     | 695  | 18   | 677             | (0.629 – 0.842) | (0.873 – 0.918) | (0.346 – 0.466) | (0.962 – 0.983)  | (0.860 – 0.905)  |
| <b>Cohen L.M.</b>       | 450                       | Not surprised | 71   | 39   | 32              | 0.379           | 0.908           | 0.549           | 0.831            | 0.787            |
|                         |                           | Surprised     | 379  | 64   | 315             | (0.285 – 0.480) | (0.872 – 0.936) | (0.447 – 0.648) | (0.808 – 0.852)  | (0.746 – 0.824)  |
| <b>Moss A.H.</b>        | 147                       | Not surprised | 34   | 10   | 24              | 0.455           | 0.808           | 0.294           | 0.894            | 0.755            |
|                         |                           | Surprised     | 113  | 12   | 101             | (0.244 – 0.678) | (0.728 – 0.873) | (0.189 – 0.427) | (0.851 – 0.926)  | (0.677 – 0.822)  |
| <b>Ros M.M.</b>         | 3140 (ICU stay)           | Not surprised | 153  | 98   | 55              | 0.363           | 0.981           | 0.641           | 0.942            | 0.928            |
|                         |                           | Surprised     | 2987 | 172  | 2815            | (0.306 – 0.423) | (0.975 – 0.986) | (0.568 – 0.708) | (0.937 – 0.947)  | (0.918 – 0.937)  |
|                         | 3140 (Hospital stay)      | Not surprised | 252  | 148  | 104             | 0.378           | 0.962           | 0.587           | 0.916            | 0.889            |
|                         |                           | Surprised     | 2888 | 244  | 2644            | (0.329 – 0.428) | (0.954 – 0.969) | (0.531 – 0.641) | (0.909 – 0.921)  | (0.878 – 0.900)  |
| 3140 (365 days)         | Not surprised             | 609           | 363  | 246  | 0.509           | 0.899           | 0.596           | 0.862           | 0.810            |                  |
|                         | Surprised                 | 2531          | 350  | 2181 | (0.471 – 0.546) | (0.886 – 0.910) | (0.562 – 0.629) | (0.852 – 0.871) | (0.796 – 0.824)  |                  |
| <b>Gulini J.E.H.M.B</b> | 170                       | Not surprised | 89   | 41   | 48              | 0.820           | 0.600           | 0.461           | 0.889            | 0.665            |
|                         |                           | Surprised     | 81   | 9    | 72              | (0.686 – 0.914) | (0.507 – 0.688) | (0.398 – 0.524) | (0.813 – 0.936)  | (0.588 – 0.7350) |
| <b>Haydar S.A.</b>      | 6122                      | Not surprised | 918  | 107  | 811             | 0.682           | 0.864           | 0.117           | 0.990            | 0.859            |
|                         |                           | Surprised     | 5204 | 50   | 5154            | (0.603 – 0.754) | (0.855 – 0.873) | (0.104 – 0.130) | (0.988 – 0.992)  | (0.850 – 0.868)  |
| <b>Carmen J.</b>        | 49                        | Not surprised | 20   | 7    | 13              | 0.778           | 0.675           | 0.350           | 0.931            | 0.694            |
|                         |                           | Surprised     | 29   | 2    | 27              | (0.400 – 0.972) | (0.509 – 0.814) | (0.234 – 0.487) | (0.796 – 0.979)  | (0.546 – 0.818)  |
| <b>Barnes S.</b>        | 231                       | Not surprised | 95   | 11   | 84              | 0.786           | 0.613           | 0.116           | 0.978            | 0.623            |
|                         |                           | Surprised     | 136  | 3    | 133             | (0.492 – 0.953) | (0.545 – 0.678) | (0.087 – 0.153) | (0.942 – 0.992)  | (0.558 – 0.686)  |
| <b>Straw S.</b>         | 114 (Consultants)         | Not surprised | 64   | 33   | 31              | 0.846           | 0.587           | 0.516           | 0.880            | 0.675            |
|                         |                           | Surprised     | 50   | 6    | 44              | (0.695 – 0.941) | (0.467 – 0.699) | (0.441 – 0.590) | (0.774 – 0.940)  | (0.581 – 0.760)  |
|                         | 128 (Junior Doctors)      | Not surprised | 65   | 33   | 32              | 0.750           | 0.619           | 0.508           | 0.825            | 0.664            |
|                         |                           | Surprised     | 63   | 11   | 52              | (0.597 – 0.868) | (0.507 – 0.723) | (0.428 – 0.587) | (0.734 – 0.890)  | (0.575 – 0.745)  |
|                         | 89 (Heart Failure Nurses) | Not surprised | 60   | 27   | 33              | 0.900           | 0.441           | 0.450           | 0.897            | 0.596            |
|                         |                           | Surprised     | 29   | 3    | 26              | (0.735 – 0.979) | (0.312 – 0.576) | (0.388 – 0.514) | (0.740 – 0.963)  | (0.496 – 0.698)  |
|                         | 123 (Staff Nurses)        | Not surprised | 50   | 29   | 21              | 0.659           | 0.734           | 0.580           | 0.795            | 0.707            |
|                         |                           | Surprised     | 73   | 15   | 58              | (0.501 – 0.795) | (0.623 – 0.827) | (0.475 – 0.678) | (0.715 – 0.856)  | (0.619 – 0.786)  |
|                         | 119 (2 or more)           | Not surprised | 62   | 26   | 36              | 0.818           | 0.577           | 0.500           | 0.860            | 0.659            |

|                   |                  |               |     |    |                 |                 |                 |                 |                 |                 |
|-------------------|------------------|---------------|-----|----|-----------------|-----------------|-----------------|-----------------|-----------------|-----------------|
|                   | 129 (3 or more)  | Surprised     | 57  | 8  | 49              | (0.673 – 0.918) | (0.465 – 0.683) | (0.429 – 0.571) | (0.761 – 0.922) | (0.570 – 0.740) |
|                   |                  | Not surprised | 54  | 31 | 23              | 0.705           | 0.729           | 0.574           | 0.827           | 0.721           |
|                   | 129 (4 'no's')   | Surprised     | 75  | 13 | 62              | (0.548 – 0.832) | (0.622 – 0.820) | (0.475 – 0.667) | (0.748 – 0.885) | (0.635 – 0.796) |
|                   |                  | Not surprised | 18  | 14 | 4               | 0.318           | 0.953           | 0.778           | 0.730           | 0.736           |
|                   | 129 (all 'no')   | Surprised     | 111 | 30 | 81              | (0.186 – 0.476) | (0.884 – 0.987) | (0.551 – 0.909) | (0.687 – 0.769) | (0.652 – 0.810) |
|                   |                  | Not surprised | 35  | 23 | 12              | 0.523           | 0.859           | 0.657           | 0.777           | 0.744           |
|                   | 32 (Diabetes)    | Surprised     | 94  | 21 | 73              | (0.367 – 0.675) | (0.766 – 0.925) | (0.514 – 0.777) | (0.716 – 0.827) | (0.660 – 0.817) |
|                   |                  | Not surprised | 20  | 9  | 11              | 0.900           | 0.500           | 0.450           | 0.917           | 0.625           |
|                   | 82 (no diabetes) | Surprised     | 12  | 1  | 11              | (0.555 – 0.998) | (0.282 – 0.718) | (0.339 – 0.566) | (0.621 – 0.987) | (0.437 – 0.789) |
|                   |                  | Not surprised | 44  | 24 | 20              | 0.828           | 0.623           | 0.546           | 0.868           | 0.695           |
|                   | 35 (IHD)         | Surprised     | 38  | 5  | 33              | (0.642 – 0.942) | (0.479 – 0.752) | (0.450 – 0.638) | (0.743 – 0.938) | (0.584 – 0.792) |
|                   |                  | Not surprised | 20  | 14 | 6               | 0.824           | 0.667           | 0.700           | 0.800           | 0.743           |
|                   | 79 (no IHD)      | Surprised     | 15  | 3  | 12              | (0.566 – 0.962) | (0.450 – 0.867) | (0.539 – 0.823) | (0.577 – 0.922) | (0.567 – 0.875) |
|                   |                  | Not surprised | 44  | 19 | 25              | 0.864           | 0.562           | 0.432           | 0.914           | 0.646           |
|                   | 18 (eGFR < 30)   | Surprised     | 35  | 3  | 32              | (0.651 – 0.971) | (0.424 – 0.693) | (0.352 – 0.516) | (0.784 – 0.969) | (0.530 – 0.750) |
|                   |                  | Not surprised | 17  | 10 | 7               | 0.909           | 0.000           | 0.588           | 0.000           | 0.556           |
| 96 (eGFR > 30)    | Surprised        | 1             | 1   | 0  | (0.587 – 0.998) | (0.000 – 0.410) | (0.542 – 0.633) | 0.000           | (0.308 – 0.785) |                 |
|                   | Not surprised    | 47            | 23  | 24 | 0.821           | 0.647           | 0.489           | 0.898           | 0.698           |                 |
| <b>Mahes A.</b>   | 301              | Surprised     | 49  | 5  | 44              | (0.631 – 0.939) | (0.522 – 0.759) | (0.399 – 0.580) | (0.796 – 0.952) | (0.596 – 0.788) |
|                   |                  | Not surprised | 136 | 25 | 111             | 0.807           | 0.589           | 0.184           | 0.964           | 0.611           |
| <b>Lin C.A.</b>   | 840              | Surprised     | 165 | 6  | 159             | (0.625 – 0.926) | (0.528 – 0.648) | (0.152 – 0.220) | (0.928 – 0.982) | (0.554 – 0.667) |
|                   |                  | Not surprised | 214 | 32 | 182             | 0.615           | 0.768           | 0.149           | 0.968           | 0.759           |
| <b>Um Y.W.</b>    | 300              | Surprised     | 626 | 20 | 606             | (0.483 – 0.748) | (0.739 – 0.798) | (0.101 – 0.196) | (0.954 – 0.982) | (0.730 – 0.788) |
|                   |                  | Not surprised | 118 | 25 | 93              | 0.833           | 0.662           | 0.212           | 0.973           | 0.679           |
| <b>Gaffney L.</b> | 191              | Surprised     | 182 | 5  | 177             | (0.653 – 0.944) | (0.603 – 0.718) | (0.176 – 0.253) | (0.942 – 0.988) | (0.623 – 0.731) |
|                   |                  | Not surprised | 56  | 20 | 36              | 0.571           | 0.769           | 0.357           | 0.889           | 0.733           |
|                   |                  | Surprised     | 135 | 15 | 120             | (0.394 – 0.737) | (0.695 – 0.833) | (0.270 – 0.455) | (0.844 – 0.922) | (0.664 – 0.794) |

Sensitivity (the ability of the prompt to successfully identify those patients who were dying); specificity (the ability of the prompt to successfully identify those who were not dying); positive predictive value (the proportion of patients who died when the respondent predicted death); negative predictive value (the proportion of the patients who survived when the respondent predicted survival); accuracy (the proportion of correct predictions amongst all cases).



**Table 4:** Newcastle-Ottawa scale for included studies.

| First author          | Representativeness of exposed cohort | Selection of non-exposed cohort | Ascertainment of exposure | Outcome of interest accounted for | Age/gender | Other factors | Ascertainment of outcomes | Length of follow-up | Adequacy of follow-up | Quality of study |
|-----------------------|--------------------------------------|---------------------------------|---------------------------|-----------------------------------|------------|---------------|---------------------------|---------------------|-----------------------|------------------|
| Rice J.               | *                                    | *                               | *                         | *                                 | *          |               | *                         | *                   | *                     | Good             |
| Ikari T.              | *                                    | *                               | *                         | *                                 | *          | *             |                           | *                   | *                     | Good             |
| Dogbey D.M.           | *                                    | *                               | *                         | *                                 | *          | *             | *                         | *                   | *                     | Good             |
| Moor C.C.             | *                                    | *                               | *                         | *                                 | *          | *             | *                         | *                   | *                     | Good             |
| Gonzalez-Jaramillo V. | *                                    | *                               | *                         | *                                 | *          | *             | *                         | *                   | *                     | Good             |
| Tripp D.              | *                                    | *                               | *                         | *                                 | *          | *             | *                         | *                   | *                     | Good             |
| Flierman I.           | *                                    | *                               | *                         | *                                 |            |               | *                         | *                   | *                     | Poor             |
| Kim S.H.              |                                      | *                               | *                         | *                                 |            | *             |                           | *                   | *                     | Good             |
| Ouchi K.              | *                                    | *                               | *                         | *                                 | *          | *             | *                         | *                   |                       | Good             |
| Ermers D.J.M.         | *                                    | *                               | *                         | *                                 |            |               | *                         | *                   | *                     | Poor             |
| Yarnell C.            | *                                    | *                               | *                         | *                                 | *          | *             | *                         | *                   | *                     | Good             |
| Van Wijmen M.P.S.     | *                                    | *                               | *                         | *                                 | *          | *             | *                         | *                   | *                     | Good             |
| Ramer S.J.            | *                                    | *                               | *                         | *                                 | *          | *             | *                         | *                   | *                     | Good             |
| Lai C.-F.             |                                      | *                               | *                         | *                                 | *          | *             |                           |                     | *                     | Poor             |
| Rauh L.A.             | *                                    | *                               | *                         | *                                 | *          | *             | *                         | *                   | *                     | Good             |
| Verhoef M.J.          | *                                    | *                               | *                         | *                                 |            |               | *                         | *                   | *                     | Poor             |
| Maes H.               | *                                    | *                               | *                         | *                                 | *          | *             | *                         | *                   | *                     | Good             |
| Yen Y.-F.             | *                                    | *                               | *                         | *                                 | *          | *             | *                         |                     | *                     | Good             |
| Aaronson E.L.         | *                                    | *                               | *                         | *                                 |            | *             | *                         |                     | *                     | Good             |
| Schmidt R.J.          | *                                    | *                               | *                         | *                                 | *          | *             | *                         | *                   | *                     | Good             |
| Lakin J.R.            | *                                    | *                               | *                         | *                                 | *          | *             | *                         | *                   | *                     | Good             |

|                  |   |   |   |   |   |   |   |   |   |      |
|------------------|---|---|---|---|---|---|---|---|---|------|
| Veldhoven C.M.M. | * | * | * | * |   |   | * |   | * | Poor |
| Burke K.         | * | * | * | * | * | * | * |   | * | Good |
| Ouchi K.         | * | * | * | * |   |   | * | * | * | Poor |
| Liyanage T.      | * | * | * | * |   |   | * | * | * | Poor |
| Mitchell G.K.    | * | * | * | * |   |   | * |   | * | Poor |
| Ebke M.          | * | * | * | * | * | * |   | * | * | Good |
| Mudge A.M.       | * | * | * | * |   |   | * | * | * | Poor |
| Salat H.         | * | * | * | * | * | * | * | * | * | Good |
| Malhotra R.      | * | * | * | * |   |   |   | * | * | Poor |
| Hadique S.       | * | * | * | * | * | * | * | * | * | Good |
| Gomez-Batiste X. | * | * | * | * | * | * | * | * | * | Good |
| Javier A.D.      | * | * | * | * | * | * | * | * | * | Good |
| Amro O.W.        | * | * | * | * | * | * | * | * | * | Good |
| Lakin J.R.       | * | * | * | * | * | * | * |   | * | Good |
| Hamano J.        |   | * | * | * | * | * |   | * | * | Good |
| Feyi K.          | * | * | * | * | * | * |   | * | * | Good |
| Moroni M.        | * | * | * | * | * | * | * | * | * | Good |
| O'Callaghan A.   | * | * | * | * | * | * | * | * | * | Good |
| Da Silva Gane M. | * | * | * | * | * | * | * | * | * | Good |
| Pang W.-F.       | * | * | * | * |   |   | * | * | * | Poor |
| Haga K.          | * | * | * | * |   |   | * | * | * | Poor |
| Fenning S.       | * | * | * | * | * | * | * | * | * | Good |
| Moss A.H.        | * | * | * | * | * | * | * | * | * | Good |
| Cohen L.M.       | * | * | * | * | * | * |   | * | * | Good |

|                                                                                                                                                   |   |   |   |   |   |   |   |   |   |      |
|---------------------------------------------------------------------------------------------------------------------------------------------------|---|---|---|---|---|---|---|---|---|------|
| <b>Moss A.H.</b>                                                                                                                                  | * | * | * | * | * | * |   | * | * | Good |
| <b>Ros M.M.</b>                                                                                                                                   | * | * | * | * | * | * | * | * | * | Good |
| <b>Gulini J.E.H.M.B.</b>                                                                                                                          | * | * | * | * | * | * | * | * | * | Good |
| <b>Haydar S.A.</b>                                                                                                                                | * | * | * | * | * | * | * |   |   | Poor |
| <b>Carmen J.</b>                                                                                                                                  | * | * | * | * |   |   |   | * | * | Poor |
| <b>Barnes S.</b>                                                                                                                                  | * | * | * | * | * | * | * |   |   | Poor |
| <b>Straw S.</b>                                                                                                                                   | * | * | * | * | * | * | * | * | * | Good |
| <b>Mahes A.</b>                                                                                                                                   | * | * | * | * | * | * | * | * | * | Good |
| <b>Lin C.A.</b>                                                                                                                                   | * | * | * | * | * | * | * | * | * | Good |
| <b>Um Y.W.</b>                                                                                                                                    | * | * |   | * | * | * | * | * | * | Good |
| <b>Gaffney L.</b>                                                                                                                                 | * | * | * | * | * | * | * | * | * | Good |
| * denotes a study having met a particular quality item, scoring one point. The maximum points a study can score is nine, and the minimum is zero. |   |   |   |   |   |   |   |   |   |      |
